# Supplementary material
Source: publisher figshare collection journal article supplement (https://frontiersin.figshare.com/ndownloader/files/14312282)
Supplement: Supplementary file 1 [file 14312282]

Supplementary Material

**Evolution of mechanical properties of lava dome rocks across the 1995-2010 eruption of Soufrière Hills volcano, Montserrat**

Claire E. Harnett*, Jackie E. Kendrick, Anthony Lamur, Mark E. Thomas, Adam Stinton, Paul A. Wallace, James E. P. Utley, William Murphy, Jurgen Neuberg, Yan Lavallée

*** Correspondence:** Claire E. Harnett, eeceh@leeds.ac.uk

# Supplementary Tables

**Supplementary Table 1.** Individual measurements of sample geometries and densities along with connected porosity, total porosity, permeability, Young’s modulus and UCS for all samples in this study. The top row for each block shows properties of one 37 mm diameter core for each block, with the remaining samples all at 26 mm diameter core. The IDs shown in bold represent a 37 mm core that is sub-cored to produce the 26 mm core of the same ID number.

* clear pervasive fracture through sample, failed during cyclic testing (i.e. below 50% of pre-established UCS)

** did not behave elastically during the cyclic testing, not considered in data plots or averaging calculations

*** too permeable to be measured in the GasPerm

| Phase | Block | ID | Length (mm) | Dia-meter (mm) | Density (g/cm3) | Conn. porosity (%) | Total porosity  (%) | Perm at 100 psi (m2) | Perm at 200 psi (m2) | Perm at 300 psi (m2) | E (GPa) | UCS (MPa) |
| --- | --- | --- | --- | --- | --- | --- | --- | --- | --- | --- | --- | --- |
| 1 | M | **04** | 81.58 | 37.01 | 2.26 | - | - | 4.42E-13 | 4.12E-13 | 3.99E-13 | 6.23 | - |
| 02 | 53.64 | 25.96 | 2.21 | 19.69 | 20.34 | 3.11E-13 | 2.92E-13 | 2.8E-13 | 7.20 | 25.1 |
| 03 | 50.89 | 25.94 | 2.15 | 21.51 | 22.51 | 5.67E-13 | 5.17E-13 | 4.96E-13 | 5.91 | - |
| 04 | 51.41 | 26.01 | 2.18 | 20.85 | 21.54 | 4.24E-13 | 3.98E-13 | 3.86E-13 | 4.45 | - |
| 07 | 51.95 | 25.96 | 2.14 | 22.3 | 22.87 | 6.51E-13 | 5.93E-13 | 5.63E-13 | 3.58 | - |
| 08 | 53.16 | 25.50 | 1.98 | 26.99 | 28.58 | 1.88E-12 | 1.69E-12 | 1.59E-12 | -* | - |
| 3 | B | **04** | 80.49 | 36.98 | 2.34 | - | - | 1.62E-13 | 1.22E-13 | 1.13E-13 | 7.75 | - |
| 02 | 51.13 | 25.95 | 2.12 | 23.24 | 23.75 | 1.51E-13 | 1.49E-13 | 1.47E-13 | 6.75 | 26.1 |
| 03 | 50.94 | 26.03 | 2.17 | 21.61 | 22.05 | 7.19E-14 | 7.07E-14 | 6.96E-14 | 7.74 | - |
| 04 | 50.20 | 25.98 | 2.12 | 23.48 | 24.28 | 1.06E-13 | 9.96E-14 | 9.71E-14 | 7.60 | - |
| 051 | 52.87 | 26.03 | 2.15 | 22.65 | 22.80 | 7.88E-14 | 7.55E-14 | 7.39E-14 | 6.46 | - |
| H | **09** | 79.95 | 36.42 | 2.33 | - | - | 1.32E-13 | 1.13E-13 | 1.05E-13 | 7.11 | - |
| 02 | 50.29 | 25.98 | 2.18 | 21.09 | 23.20 | 6.13E-14 | 5.98E-14 | 5.91E-14 | 7.18 | 29.5 |
| 06 | 51.84 | 26.10 | 2.09 | 24.4 | 26.25 | 1.43E-13 | 1.33E-13 | 1.25E-13 | - ** | - |
| 07 | 51.65 | 26.08 | 2.14 | 22.76 | 24.42 | 8.91E-14 | 8.60E-14 | 8.42E-14 | 8.14 | - |
| 08 | 48.53 | 25.98 | 2.16 | 21.93 | 23.76 | 7.80E-14 | 7.57E-14 | 7.44E-14 | 6.95 | - |
| 09 | 52.20 | 25.90 | 2.16 | 22.08 | 23.90 | 9.15E-14 | 8.37E-14 | 8.11E-14 | 6.47 | - |
| 4 | F | **06** | 81.57 | 37.42 | 2.27 | - | - | 1.44E-14 | 1.13E-14 | 1.04E-14 | 10.83 | - |
| 01 | 54.60 | 25.59 | 2.20 | 20.52 | 22.74 | 8.10E-15 | 7.48E-15 | 7.20E-15 | 11.42 | - |
| 02 | 52.77 | 25.94 | 2.11 | 23.77 | 26.00 | 9.38E-15 | 8.81E-15 | 8.54E-15 | 11.01 | - |
| 03 | 54.94 | 25.98 | 2.15 | 22.55 | 24.57 | 7.26E-15 | 6.72E-15 | 6.41E-15 | 10.77 | 48.6 |
| 05 | 52.92 | 25.94 | 2.09 | 20.94 | 26.76 | 1.19E-14 | 1.09E-14 | 1.04E-14 | 10.42 | - |
| 06 | 53.35 | 25.92 | 2.13 | 23.1 | 25.32 | 8.41E-15 | 7.82E-15 | 7.59E-15 | 12.29 | - |
| G | **032** | 79.96 | 37.78 | 2.28 | - | - | 9.63E-15 | 8.1E-15 | 7.67E-15 | 11.58 | - |
| 031 | 49.88 | 26.01 | 2.15 | 22.57 | 24.78 | 7.09E-15 | 6.78E-15 | 6.55E-15 | 11.39 | 51.1 |
| 032 | 50.31 | 26.04 | 2.10 | 24.38 | 26.47 | 8.20E-15 | 7.81E-15 | 7.54E-15 | 9.37 | - |
| 041 | 51.72 | 26.02 | 2.07 | 25.4 | 27.56 | 1.65E-14 | 1.50E-14 | 1.39E-14 | 9.94 | - |
| 061 | 53.04 | 25.98 | 2.22 | 21.1 | 22.50 | 1.38E-14 | 1.32E-14 | 1.26E-14 | 11.89 | - |
| 5 | J | **01** | 79.96 | 36.94 | 1.83 | - | - | 2.51E-11 | 2.08E-11 | 1.89E-11 | 2.36 | - |
| 01 | 54.85 | 26.03 | 1.61 | 40.17 | 41.17 | -*** | -*** | -*** | 1.39 | - |
| 02 | 53.86 | 25.91 | 1.69 | 37.2 | 38.13 | -*** | -*** | -*** | 3.29 | - |
| 04 | 52.38 | 25.93 | 1.68 | 37.57 | 36.47 | 1.75E-11 | 1.65E-11 | 1.58E-11 | 1.83 | 7.0 |
| 05 | 51.86 | 25.92 | 1.65 | 39.15 | 39.81 | 2.40E-11 | 2.26E-11 | 2.14E-11 | 2.01 | - |
| K | **02** | 81.70 | 36.93 | 2.03 | - | - | 2.44E-12 | 2.16E-12 | 2.07E-12 | 3.89 | - |
| 01 | 54.36 | 26.01 | 1.91 | 29.16 | 30.17 | 2.00E-12 | 1.89E-12 | 1.83E-12 | 4.05 | - |
| 02 | 53.27 | 25.91 | 1.89 | 30.19 | 31.05 | 2.24E-12 | 2.06E-12 | 1.99E-12 | 3.90 | - |
| 03 | 48.36 | 25.94 | 1.83 | 32.32 | 33.22 | 3.37E-12 | 3.02E-12 | 2.83E-12 | 1.84 | - |
| 036 | 48.69 | 25.91 | 1.84 | 32.08 | 32.85 | 2.98E-12 | 2.74E-12 | 2.56E-12 | - ** | - |
| 09 | 52.32 | 26.00 | 1.86 | 31.6 | 32.28 | 2.68E-12 | 2.47E-12 | 2.35E-12 | 3.05 | 6.2 |

**Supplementary Table 2.** Individual measurements of tensile strength obtained by Brazilian disk testing along with core geometries and densities.

| Phase | Block | Core ID | Length (mm) | Diameter (mm) | Calculated density (g/cm3) | Tensile Strength (MPa) |
| --- | --- | --- | --- | --- | --- | --- |
| 1 | M | 01 | 23.7 | 37.0 | 2.14 | 2.08 |
|  | 03 | 17.9 | 36.9 | 2.22 | 2.45 |
|  | 031 | 20.1 | 36.8 | 2.13 | 1.86 |
|  | 04 | 20.3 | 37.0 | 2.24 | 2.62 |
|  | 041 | 21.0 | 36.9 | 2.22 | 2.32 |
|  | 05 | 23.5 | 37.0 | 2.16 | 2.06 |
|  | 06 | 21.9 | 37.0 | 2.17 | 2.23 |
|  | 07 | 22.2 | 36.9 | 2.20 | 2.35 |
|  | 08  09 | 23.6  19.5 | 36.8  37.0 | 2.25  2.21 | 2.38  2.62 |
|  |
|  | 10 | 20.1 | 36.9 | 2.25 | 2.83 |
|  | 11 | 16.3 | 36.9 | 2.15 | 1.96 |
|  | 12 | 20.2 | 36.9 | 2.18 | 1.98 |
|  | 13 | 18.9 | 36.9 | 2.17 | 1.18 |
|  | 14 | 18.8 | 36.9 | 1.87 | 1.03 |
| 3 | B | 02 | 16.4 | 36.9 | 2.09 | 1.59 |
| 03 | 17.2 | 36.7 | 2.30 | 2.88 |
| 04 | 19.9 | 36.9 | 2.14 | 2.37 |
| 041 | 20.8 | 36.9 | 2.14 | 2.06 |
| 05 | 17.0 | 36.8 | 2.12 | 2.15 |
| 072 | 16.2 | 36.9 | 2.15 | 2.34 |
| H | 01 | 24.8 | 37.0 | 2.13 | 2.18 |
| 011 | 24.9 | 36.9 | 2.15 | 2.56 |
| 012 | 28.1 | 36.9 | 2.15 | 2.29 |
| 02 | 20.3 | 36.9 | 2.18 | 3.21 |
| 031 | 23.7 | 37.0 | 2.17 | 3.03 |
| 032 | 18.8 | 37.0 | 2.17 | 3.17 |
| 05 | 26.4 | 36.9 | 2.13 | 2.46 |
| 051 | 23.3 | 38.4 | 1.98 | 1.94 |
| 08 | 16.6 | 36.9 | 2.23 | 2.31 |
| 081 | 16.6 | 36.9 | 2.05 | 2.75 |
| 09 | 22.7 | 36.9 | 2.17 | 2.67 |
| 4 | F | 01 | 18.4 | 37.7 | 2.16 | 3.06 |
| 012 | 24.6 | 37.6 | 2.12 | 2.66 |
| 02 | 17.0 | 37.6 | 2.07 | 2.95 |
| 03 | 18.7 | 37.8 | 2.15 | 2.89 |
| 031 | 24.5 | 37.8 | 2.10 | 3.05 |
| 032 | 23.5 | 37.8 | 2.11 | 3.73 |
| 04 | 21.7 | 37.8 | 2.03 | 2.98 |
| 05 | 18.9 | 37.7 | 2.06 | 3.57 |
| 051 | 22.5 | 37.8 | 2.16 | 3.90 |
| 06 | 23.3 | 37.8 | 2.05 | 2.46 |
| 061 | 21.8 | 37.7 | 2.06 | 2.92 |
| 071 | 19.4 | 37.7 | 2.06 | 2.02 |
| 072 | 22.3 | 37.6 | 2.06 | 2.86 |
| G | 03 | 17.1 | 37.9 | 2.09 | 3.27 |
| 031 | 22.6 | 37.8 | 2.16 | 4.05 |
| 032 | 19.6 | 37.7 | 2.13 | 3.72 |
| 04 | 17.8 | 37.0 | 2.18 | 4.15 |
| 042 | 16.5 | 37.1 | 2.06 | 3.19 |
| 061 | 16.6 | 37.9 | 2.09 | 3.66 |
| 5 | J | 01 | 23.6 | 36.9 | 1.65 | 0.78 |
| 02 | 18.2 | 36.9 | 1.65 | 0.74 |
| 03 | 19.5 | 37.0 | 1.66 | 0.71 |
| 04 | 18.2 | 36.9 | 1.62 | 0.74 |
| 05 | 19.5 | 36.9 | 1.64 | 0.54 |
| 06 | 16.9 | 37.0 | 1.69 | 0.81 |
| K | 01 | 19.9 | 36.9 | 1.97 | 1.19 |
| 012 | 21.8 | 36.9 | 1.92 | 1.34 |
| 036 | 21.8 | 36.9 | 1.96 | 1.27 |
| 04 | 21.7 | 36.9 | 1.92 | 1.25 |
| 05 | 18.8 | 36.9 | 1.74 | 0.81 |
| 05 | 23.8 | 36.9 | 1.85 | 1.07 |
| 051 | 22.3 | 36.9 | 1.81 | 1.01 |
| 09 | 18.3 | 36.9 | 1.99 | 1.60 |
| 091 | 19.8 | 36.0 | 1.82 | 0.53 |

**Supplementary Table 3.** Mean Schmidt hammer values, and width, depth and height of each block given in cm; * indicates that the dimension was not exposed.

| Phase | Width | Depth | Height | Mean RL |
| --- | --- | --- | --- | --- |
| 1 | 143 | * | * | 29.05 |
|  | 109 | 72 | 56 | 24.8 |
|  | 135 | 228 | * | 30.5 |
|  | 85 | 62 | 81 | 47.9 |
| 3 | 1000 | 500 | 600 | 37.25 |
|  | 800 | 400 | 300 | 35.55 |
|  | 500 | 450 | 200 | 43.75 |
| 4 | 600 | 400 | 150 | 34.1 |
|  | 300 | 300 | 200 | 37.45 |
|  | 125 | 42 | 68 | 33.35 |
|  | 550 | 200 | 300 | 23.95 |
|  | 280 | 200 | 150 | 40.9 |
|  | 300 | 150 | 300 | 37.7 |
|  | 250 | 150 | 150 | 33.25 |
|  | 182 | 157 | 138 | 42.9 |
|  | 280 | 350 | 450 | 42.45 |
| 5 | 800 | 300 | 600 | 20.3 |
|  | 500 | 400 | 300 | 40.55 |
|  | 700 | 500 | 400 | 29.1 |
|  | 450 | 800 | 400 | 12.5 |
|  | 450 | 800 | 400 | 24.4 |
|  | 400 | 250 | 300 | 27.9 |
|  | 175 | 124 | 163 | 19.7 |
|  | 350 | 600 | 300 | 18.2 |
| BRV Samples | 94 | 49 | 67 | 45.95 |
| 107 | 107 | 57 | 26.8 |
|  | 97 | 115 | 53 | 38.6 |
|  | 82 | 52 | 63 | 24.85 |
|  | 136 | 70 | 72 | 35.05 |
|  | 113 | 62 | 57 | 19.15 |
|  | 86 | 58 | 42 | 24.9 |
|  | 112 | 94 | 66 | 42.05 |
|  | 92 | 34 | 42 | 15.9 |
|  | 104 | 48 | 86 | 21.7 |
|  | 87 | 73 | 75 | 34 |
|  | 94 | 82 | 69 | 45.5 |
|  | 82 | 51 | 32 | 39.4 |
|  | 204 | 197 | 114 | 47.05 |
|  | 84 | 95 | 53 | 6 |
|  | 51 | 47 | 14 | 43.35 |
|  | 258 | 139 | 132 | 27.9 |
|  | 77 | 86 | 32 | 48.1 |
|  | 104 | 93 | 95 | 47.8 |
|  | 84 | 95 | 53 | 20.95 |
|  | 62 | 49 | 25 | 35.65 |
|  | 180 | 122 | 113 | 43 |
|  | 116 | 72 | 47 | 33.55 |
|  | 62 | 53 | 33 | 42.15 |
|  | 84 | 40 | 67 | 34.15 |
|  | 67 | 59 | 35 | 46.9 |
|  | 120 | 96 | 62 | 39.8 |
|  | 66 | 48 | 35 | 29.75 |

**Supplementary Table 4.** For each of Uniaxial Compressive Strength (UCS), Uniaxial Tensile Strength (UTS), and Young’s modulus (E): number of tests, average, and standard deviation for each phase. Averages given for 26 mm diameter cores only, and exclude 37 mm diameter cores.

|  | UCS | | | UTS | | | E | | |
| --- | --- | --- | --- | --- | --- | --- | --- | --- | --- |
| Phase | # of tests | Av. (MPa) | Std. Dev. (MPa) | # of tests | Av. (MPa) | Std. Dev. (MPa) | # of tests | Av. (GPa) | Std. Dev. (GPa) |
| 1 | 1 | 25.11 | n/a | 15 | 2.13 | 0.50 | 4 | 5.29 | 1.39 |
| 3 | 2 | 26.90 | 1.68 | 17 | 2.47 | 0.44 | 8 | 7.16 | 0.58 |
| 4 | 2 | 49.82 | 1.23 | 19 | 3.22 | 0.56 | 9 | 10.94 | 0.88 |
| 5 | 2 | 6.59 | 0.38 | 15 | 0.96 | 0.32 | 8 | 2.67 | 0.96 |

# Supplementary Figures


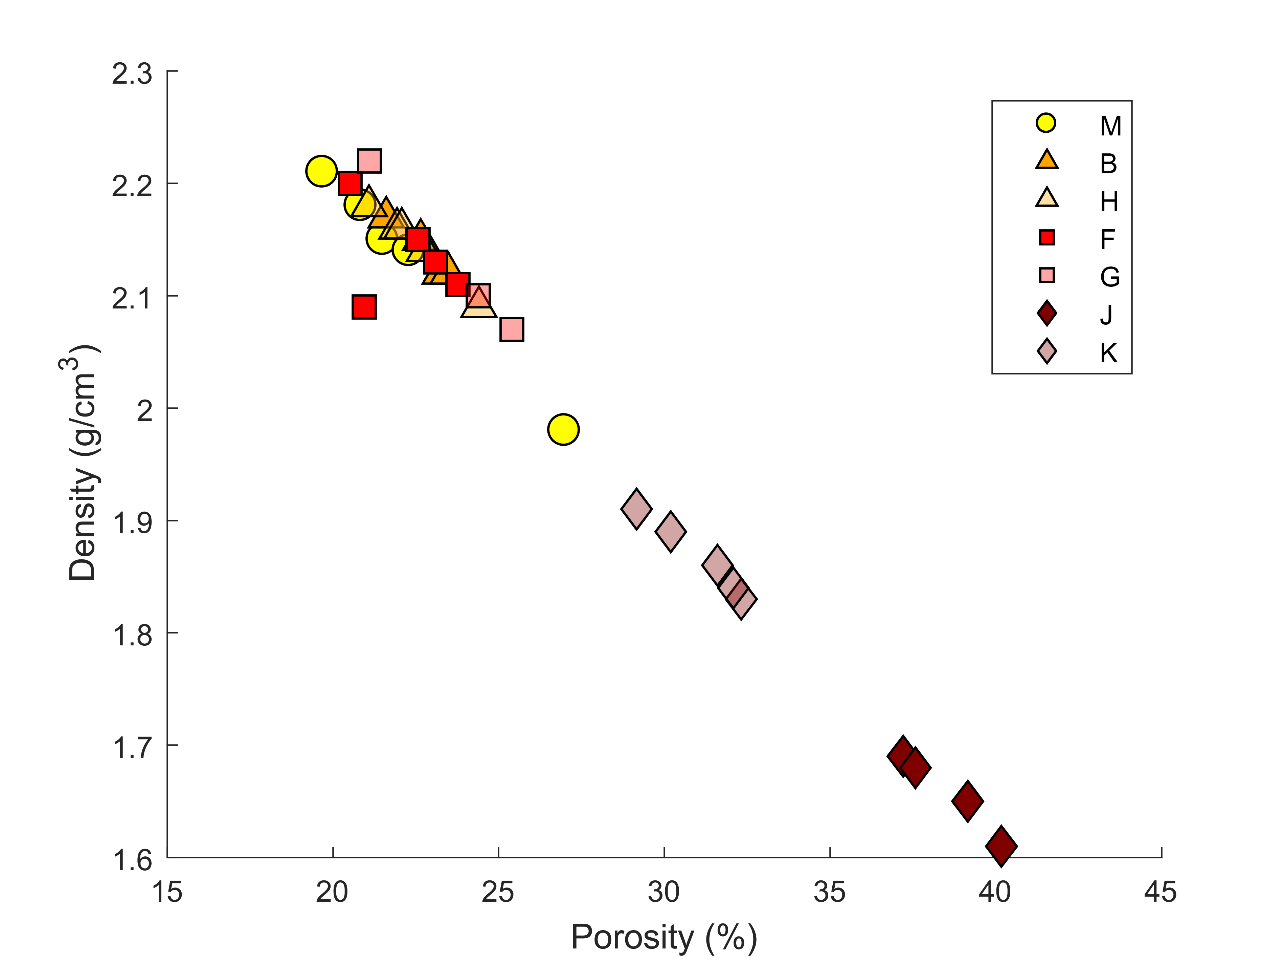


**Supplementary Figure 1**. Rock density as function of total porosity, shown by block label. The data show a near-linear relationship (raw values in Supplementary Table 1).


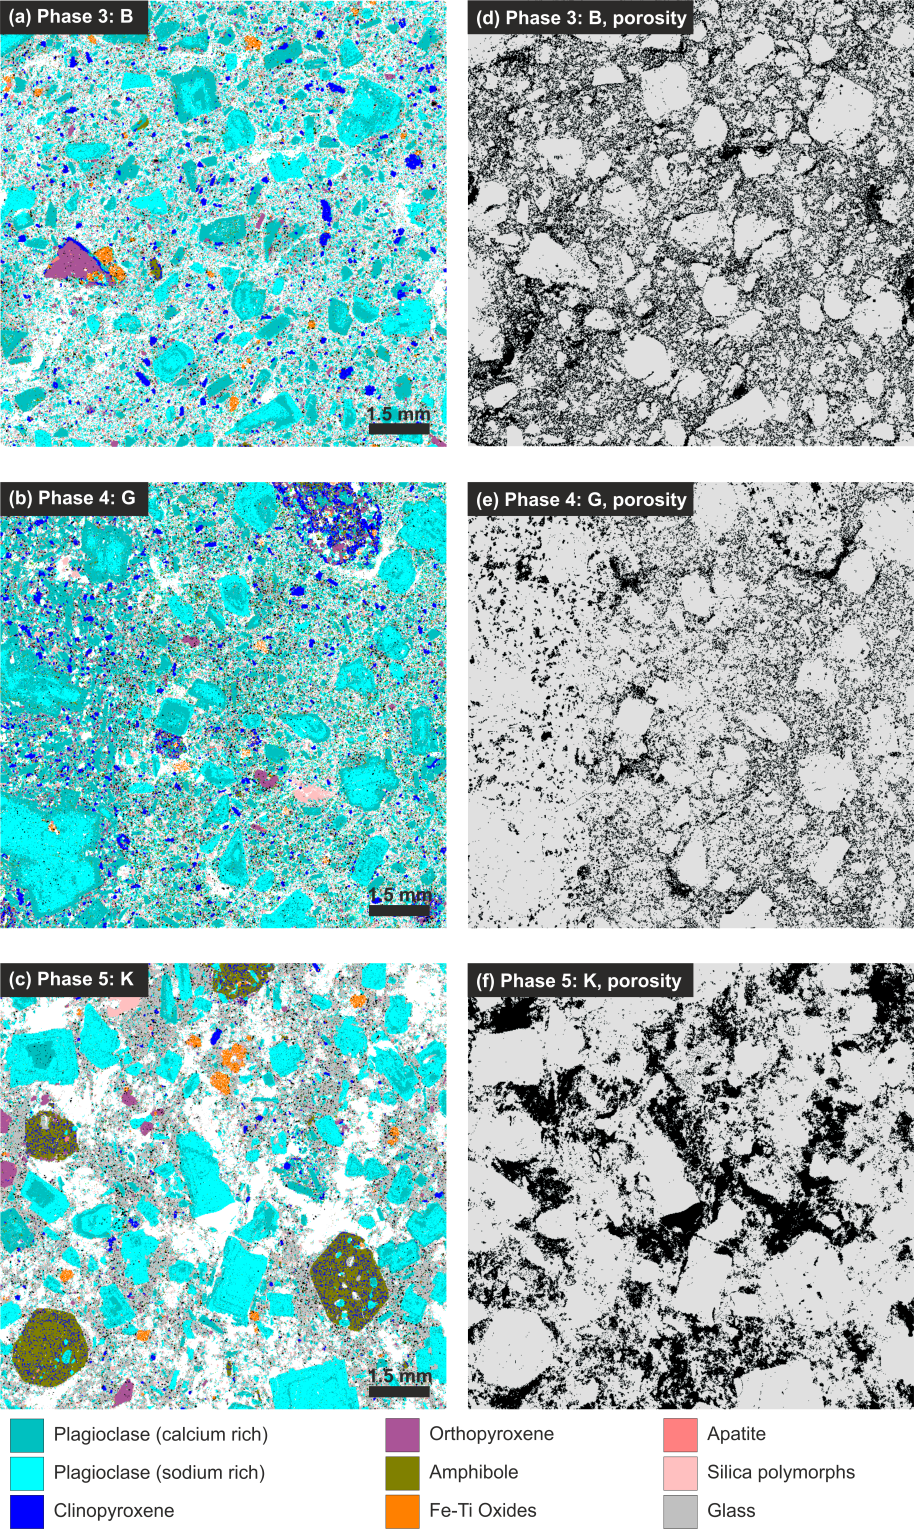


**Supplementary Figure 2.**  **(a-c)** QEMSCAN images showing mineral assemblage in remaining samples from each phase – key shown below images and white shows porosity in all cases; **(d-f)** processed QEMSCAN images where all minerals are shown in gray, and all porosity is highlighted in black.


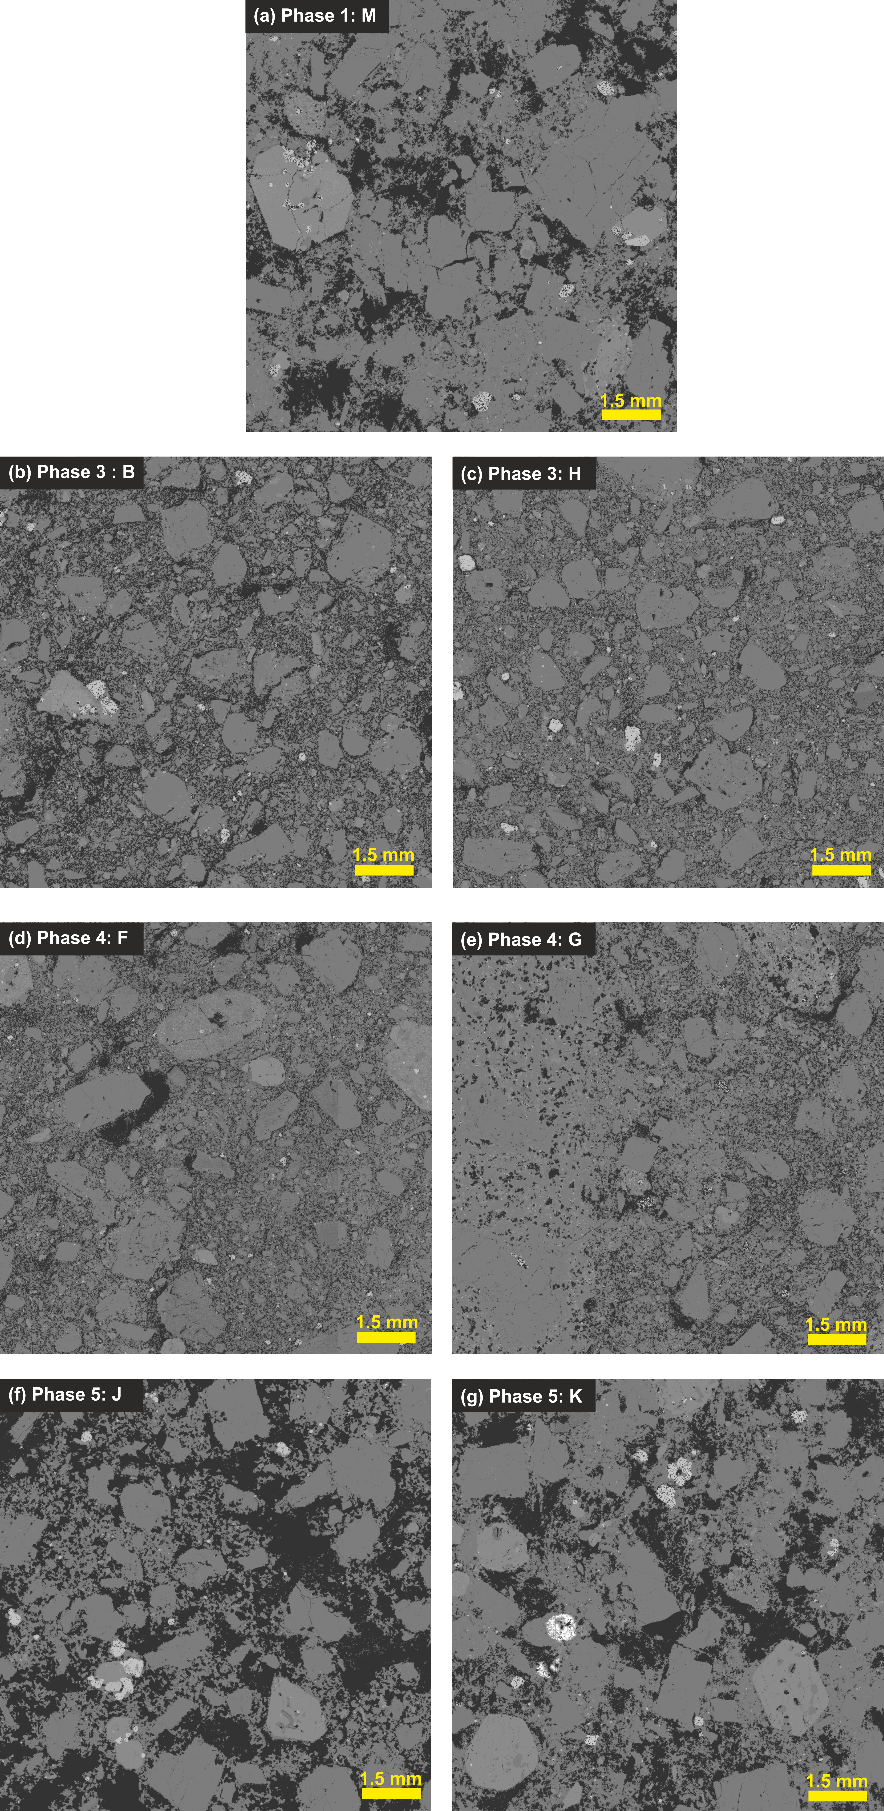


**Supplementary Figure 3.** Back scattered electron images for each of the rocks analyzed using the QEMSCAN. Each panel shows the same rock area shown in either Figure 3 or Supplementary Figure 2.

**
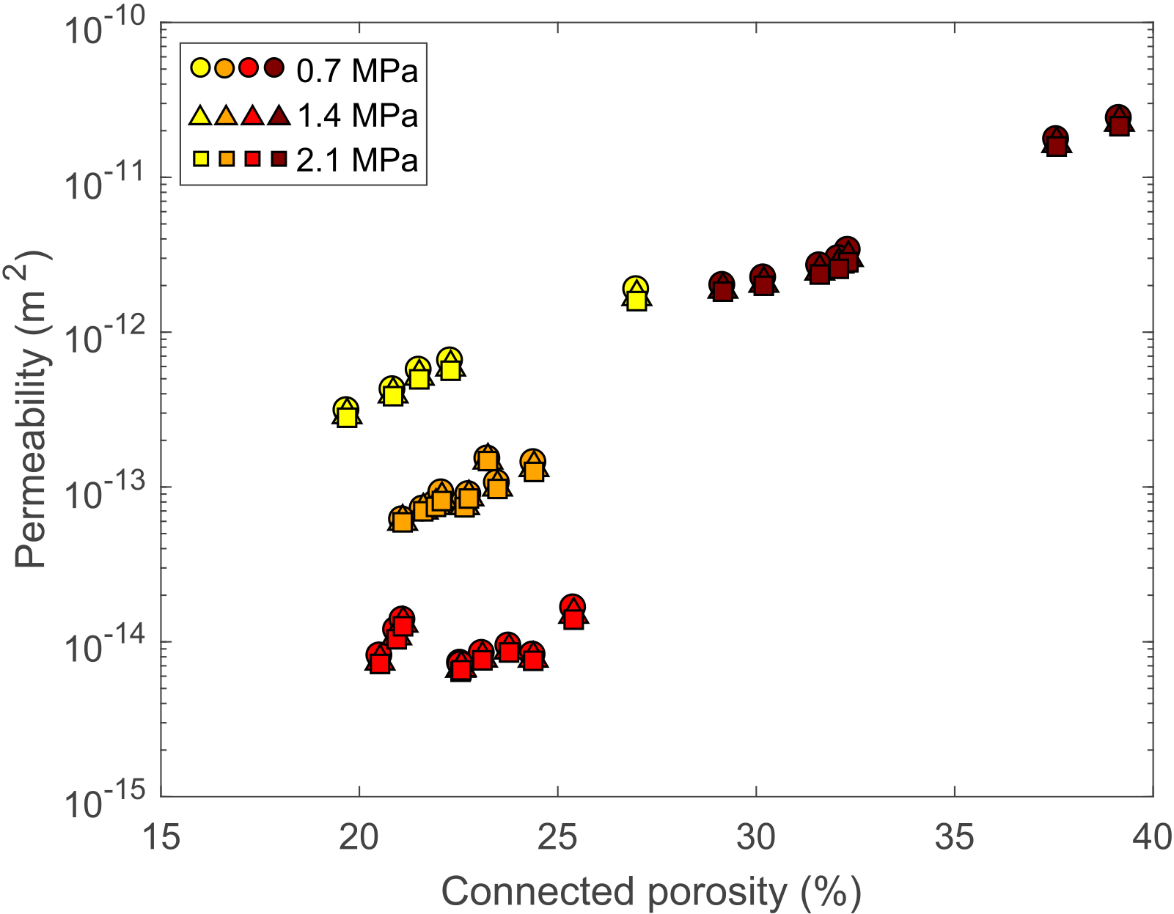
**

**Supplementary Figure 4.** Permeability as a function of connected porosity, shown at confining pressures of 0.7 MPa, 1.4 MPa and 2.1 MPa. The color refers to Phases (as depicted elsewhere): Phase 1: yellow; Phase 3: orange; Phase 4: red; Phase 4: mauve.


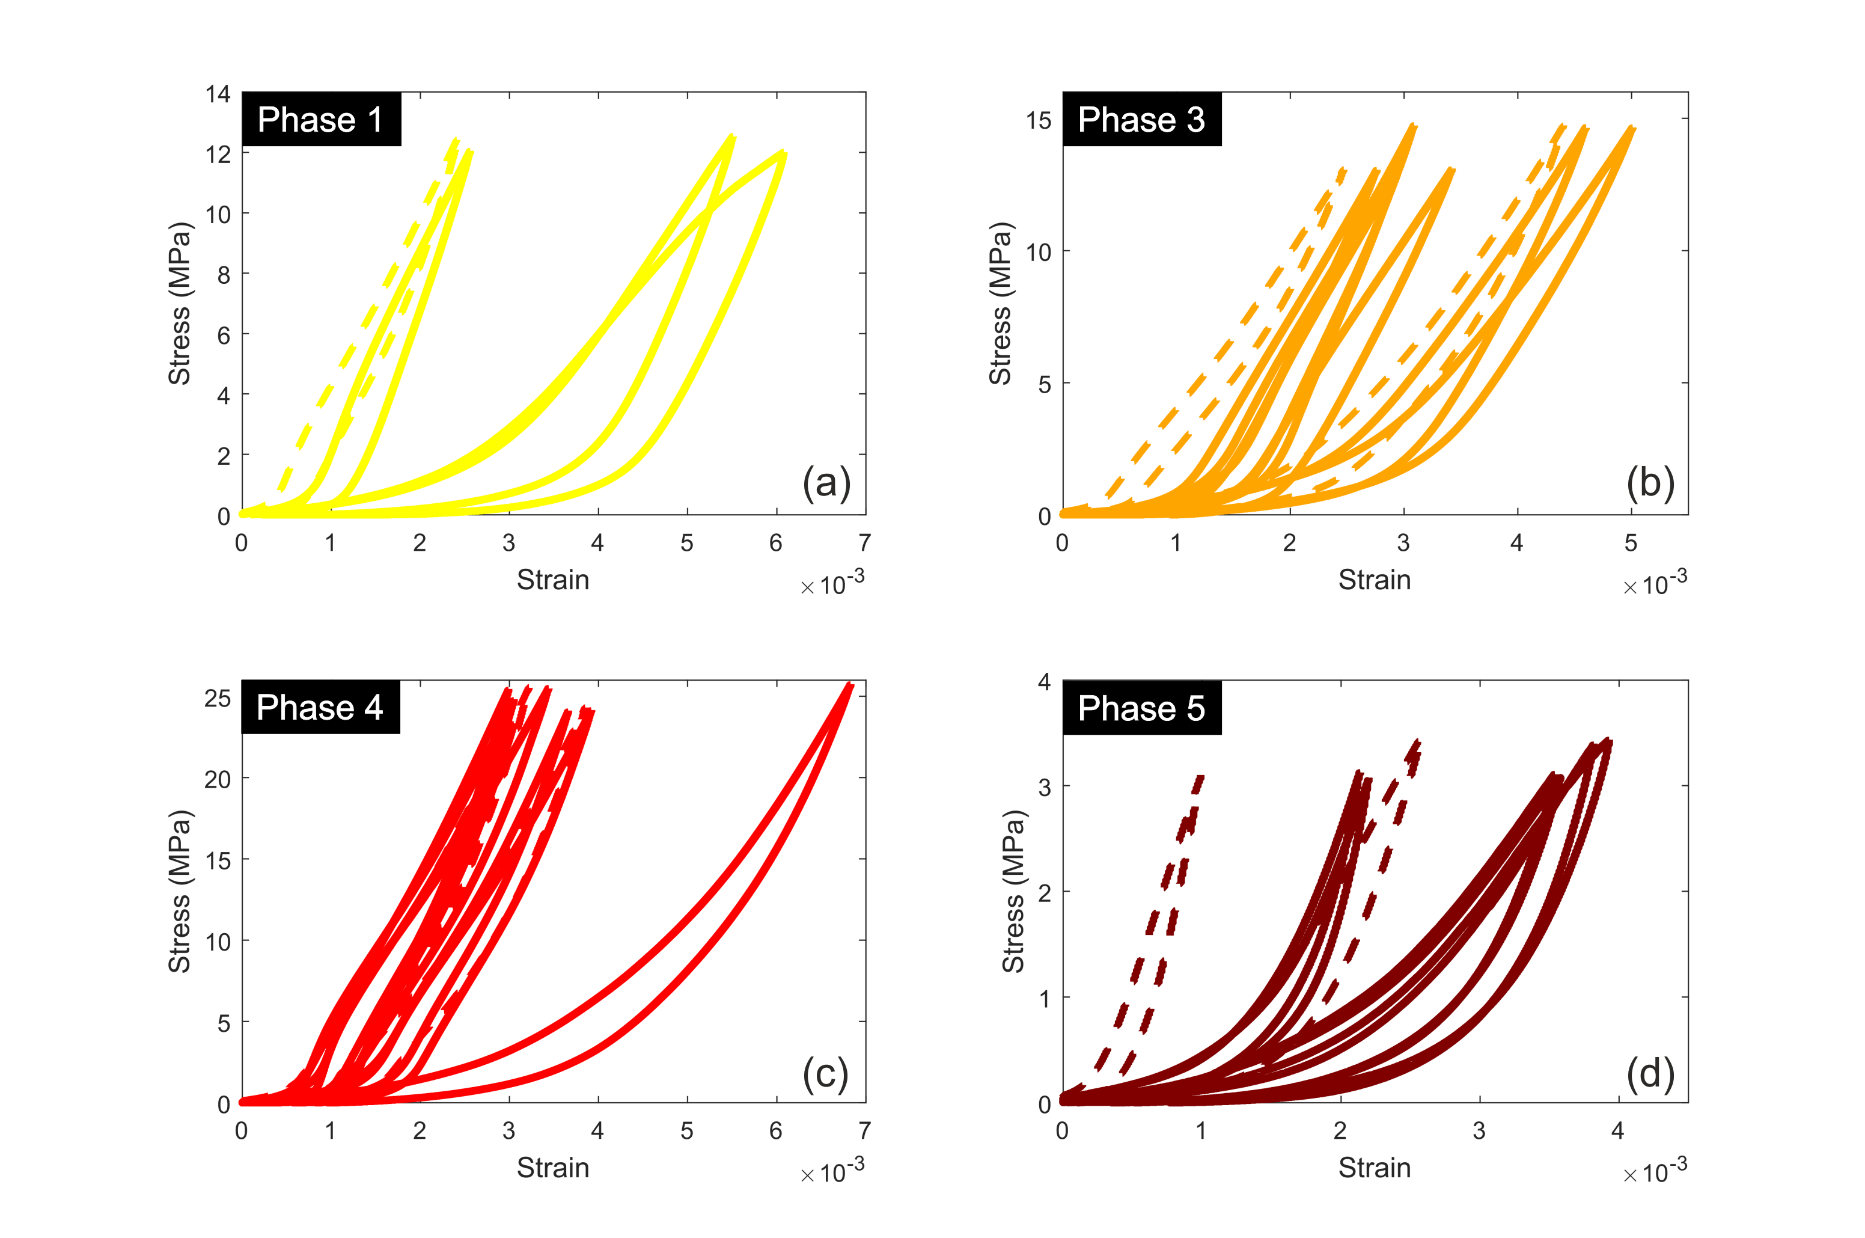


**Supplementary Figure 5.** Stress-strain plots for cyclic loading tests in each phase, where solid lines show tests on 26 mm diameter cores, and dashed lines show tests on 37 mm diameter cores for **(a)** Phase 1, **(b)** Phase 3, **(c)** Phase 4, and **(d)** Phase 5.
